# Supplementary material for: Urine drug screen positive for cocaine and amphetamine is not an adverse risk factor for cardiovascular morbidity or mortality in trauma
Source: HighWire-hosted journal article supplement (doi:10.1136/tsaco-2021-000749), 2021-08-01
Supplement: tsaco-2021-000749supp001_data_supplement.pdf [file tsaco-2021-000749supp001_data_supplement.pdf]

| <b>Characteristics</b>                  | <b>Drug Tested</b> | <b>Not Drug Tested</b> |
|-----------------------------------------|--------------------|------------------------|
| <b>Sex, Female</b>                      | 105491(33.2%)      | 290529(43.2%)          |
| <b>Race (White vs Non-white)</b>        | 217508(68.5%)      | 506758(75.4%)          |
| <b>Hispanic Ethnicity</b>               | 18075(30.8%)       | 30961(30.5%)           |
| <b>Angina Pectoris</b>                  | 240(0.1%)          | 810(0.1%)              |
| <b>Myocardial Infarction</b>            | 2240(0.7%)         | 6485(1.0%)             |
| <b>Congestive Heart Failure</b>         | 8398(2.6%)         | 28650(4.3%)            |
| <b>Hypertension</b>                     | 82359(25.9%)       | 227047(33.8%)          |
| <b>Diabetes Mellitus</b>                | 32835(19.3%)       | 89112(13.3%)           |
| <b>Peripheral Arterial Disease</b>      | 1102(0.3%)         | 3876(0.6%)             |
| <b>Stroke</b>                           | 6145(1.9%)         | 19008(2.8%)            |
| <b>Chronic Renal Failure</b>            | 2907(0.9%)         | 12373(1.8%)            |
| <b>Anticoagulant Use</b>                | 16060(5.1%)        | 57286(8.5%)            |
| <b>Bleeding Disorder</b>                | 4313(1.4%)         | 10944(1.6%)            |
| <b>Cirrhosis</b>                        | 3506(1.1%)         | 6115(0.9%)             |
| <b>Emphysema</b>                        | 16584(5.2%)        | 44525(6.6%)            |
| <b>Dementia</b>                         | 8846(2.8%)         | 42909(6.4%)            |
| <b>Disseminated Cancer</b>              | 1510(0.5%)         | 3982(0.6%)             |
| <b>Receiving Chemotherapy</b>           | 691(0.2%)          | 2805(0.4%)             |
| <b>Alcoholism</b>                       | 27483(8.7%)        | 24968(3.7%)            |
| <b>Smoker</b>                           | 76580(24.1%)       | 100919(15.0%)          |
| <b>History of Substance Abuse</b>       | 33166(10.4%)       | 17865(2.7%)            |
| <b>Positive Alcohol on Presentation</b> | 69911(28.7%)       | 45819(26.1%)           |
| <b>Mechanism (Penetrating vs Blunt)</b> | 35627(11.2%)       | 52061(7.7%)            |
| <b>Head Injury AIS&gt;2</b>             | 61204(19.3%)       | 92352(13.7%)           |
| <b>Chest Injury AIS&gt;2</b>            | 50977(16.0%)       | 67289(10.0%)           |
| <b>Abdominal Injury AIS&gt;2</b>        | 16066(5.1%)        | 19381(2.9%)            |
| <b>Extremity Injury AIS&gt;2</b>        | 46568(14.7%)       | 128879(19.2%)          |
| <b>Major Surgery During Admission</b>   | 118928(37.4%)      | 270610(40.2%)          |
| <b>Had Immediate Major Surgery</b>      | 36783(11.6%)       | 71317(10.6%)           |
| <b>Age, mean</b>                        | 45.4               | 48.8                   |
| <b>BMI, mean</b>                        | 27.2               | 26.6                   |
| <b>Total GCS mean</b>                   | 13.7               | 14.5                   |
| <b>Injury Severity Score mean</b>       | 10.4               | 8.3                    |

**Supplemental Table 1.** Baseline Characteristics of Patients Tested for Drugs Versus Those Not Tested
