# Supplementary material for: Urine drug screen positive for cocaine and amphetamine is not an adverse risk factor for cardiovascular morbidity or mortality in trauma
Source: HighWire-hosted journal article supplement (doi:10.1136/tsaco-2021-000749), 2021-08-01
Supplement: tsaco-2021-000749supp002_data_supplement.pdf [file tsaco-2021-000749supp002_data_supplement.pdf]

|                    |             |              |             |                 |               |             |             |                 |             |              |              |                 |
|--------------------|-------------|--------------|-------------|-----------------|---------------|-------------|-------------|-----------------|-------------|--------------|--------------|-----------------|
| <b>Organ Space</b> |             |              |             |                 |               |             |             |                 |             |              |              |                 |
| SSI                | <b>30</b>   | <b>0.13</b>  | <b>1.48</b> | <b>0.04</b>     | 6             | 0.09        | 0.99        | 0.98            | 4           | 0.1          | 1.11         | 0.84            |
| Osteomyelitis      | 7           | 0.03         | 1.62        | 0.22            | 0             | 0           | 0           | 0.25            | 0           | 0            | 0            | 0.38            |
| Other              | <b>3793</b> | <b>16.95</b> | <b>3.04</b> | <b>&lt;0.01</b> | <b>2726</b>   | <b>42.2</b> | <b>7.49</b> | <b>&lt;0.01</b> | <b>2574</b> | <b>66.93</b> | <b>11.87</b> | <b>&lt;0.01</b> |
| Respiratory        | <b>156</b>  | <b>0.7</b>   | <b>1.72</b> | <b>&lt;0.01</b> | <b>10</b>     | <b>0.15</b> | <b>0.36</b> | <b>&lt;0.01</b> | <b>2</b>    | <b>0.05</b>  | <b>0.12</b>  | <b>&lt;0.01</b> |
| Return to OR       | <b>157</b>  | <b>0.7</b>   | <b>1.41</b> | <b>&lt;0.01</b> | <b>19</b>     | <b>0.29</b> | <b>0.57</b> | <b>0.01</b>     | 13          | 0.34         | 0.66         | 0.13            |
| Sepsis             | <b>112</b>  | <b>0.5</b>   | <b>1.49</b> | <b>&lt;0.01</b> | 26            | 0.4         | 1.16        | 0.45            | 15          | 0.39         | 1.12         | 0.66            |
| Stroke             | 62          | 0.28         | 1.03        | 0.85            | 15            | 0.23        | 0.86        | 0.55            | 10          | 0.26         | 0.96         | 0.90            |
| Superficial SSI    | <b>40</b>   | <b>0.18</b>  | <b>1.7</b>  | <b>&lt;0.01</b> | 4             | 0.06        | 0.56        | 0.24            | 2           | 0.05         | 0.47         | 0.27            |
| Pressure Ulcer     | 97          | 0.43         | 1.08        | 0.44            | <b>11</b>     | <b>0.17</b> | <b>0.42</b> | <b>&lt;0.01</b> | <b>3</b>    | <b>0.08</b>  | <b>0.19</b>  | <b>&lt;0.01</b> |
| <b>Unplanned</b>   |             |              |             |                 |               |             |             |                 |             |              |              |                 |
| RICU               | <b>345</b>  | <b>1.54</b>  | <b>1.15</b> | <b>0.01</b>     | 95            | 1.47        | 1.09        | 0.40            | <b>72</b>   | <b>1.87</b>  | <b>1.39</b>  | <b>0.01</b>     |
| VAP                | <b>276</b>  | <b>1.23</b>  | <b>1.89</b> | <b>&lt;0.01</b> | <b>63</b>     | <b>0.98</b> | <b>1.42</b> | <b>0.01</b>     | <b>53</b>   | <b>1.38</b>  | <b>2.01</b>  | <b>&lt;0.01</b> |
| Mortality          | <b>724</b>  | <b>3.24</b>  | <b>0.9</b>  | <b>&lt;0.01</b> | <b>194</b>    | <b>3</b>    | <b>0.84</b> | <b>0.01</b>     | <b>98</b>   | <b>2.55</b>  | <b>0.71</b>  | <b>&lt;0.01</b> |
|                    | <b>Mdn</b>  | <b>%</b>     | <b>RR</b>   | <b>p</b>        | <b>Opioid</b> | <b>%</b>    | <b>RR</b>   | <b>p</b>        | <b>Oxy</b>  | <b>%</b>     | <b>RR</b>    | <b>p</b>        |
| CLABSI             | <b>4</b>    | <b>0.16</b>  | <b>2.76</b> | <b>0.04</b>     | 8             | 0.04        | 0.58        | 0.13            | 2           | 0.06         | 0.95         | 0.95            |
| Deep SSI           | 3           | 0.12         | 0.91        | 0.87            | 34            | 0.15        | 1.14        | 0.47            | 4           | 0.11         | 0.85         | 0.74            |
| DVT                | 12          | 0.49         | 0.68        | 0.17            | <b>117</b>    | <b>0.52</b> | <b>0.71</b> | <b>&lt;0.01</b> | <b>13</b>   | <b>0.37</b>  | <b>0.51</b>  | <b>0.01</b>     |
| EtOH               |             |              |             |                 |               |             |             |                 |             |              |              |                 |
| Withdrawal         | 29          | 1.18         | 1.36        | 0.10            | 193           | 0.86        | 0.99        | 0.85            | 34          | 0.97         | 1.12         | 0.53            |
| Cardiac Arrest     | 13          | 0.53         | 0.83        | 0.52            | <b>93</b>     | <b>0.41</b> | <b>0.64</b> | <b>&lt;0.01</b> | <b>10</b>   | <b>0.29</b>  | <b>0.45</b>  | <b>0.01</b>     |
| CAUTI              | <b>12</b>   | <b>0.49</b>  | <b>1.77</b> | <b>0.05</b>     | 49            | 0.22        | 0.78        | 0.08            | 13          | 0.37         | 1.34         | 0.29            |
| Embolism           | 9           | 0.37         | 1.09        | 0.79            | 77            | 0.34        | 1.03        | 0.82            | 6           | 0.17         | 0.51         | 0.09            |
| Extremity CS       | <b>6</b>    | <b>0.24</b>  | <b>2.43</b> | <b>0.03</b>     | <b>35</b>     | <b>0.16</b> | <b>1.61</b> | <b>0.01</b>     | 4           | 0.11         | 1.13         | 0.81            |
| Intubation         | <b>38</b>   | <b>1.55</b>  | <b>1.39</b> | <b>0.04</b>     | <b>219</b>    | <b>0.98</b> | <b>0.87</b> | <b>0.04</b>     | 46          | 1.31         | 1.18         | 0.26            |
| Kidney             | 15          | 0.61         | 1.1         | 0.71            | 108           | 0.48        | 0.86        | 0.12            | 12          | 0.34         | 0.61         | 0.09            |
| MI                 | 4           | 0.16         | 1.11        | 0.84            | 25            | 0.11        | 0.74        | 0.15            | 3           | 0.09         | 0.58         | 0.34            |
| <b>Organ Space</b> |             |              |             |                 |               |             |             |                 |             |              |              |                 |
| SSI                | 1           | 0.04         | 0.43        | 0.39            | 20            | 0.09        | 0.95        | 0.81            | 1           | 0.03         | 0.3          | 0.21            |
| Osteomyelitis      | 0           | 0            | 0           | 0.48            | 5             | 0.02        | 1.12        | 0.81            | 0           | 0            | 0            | 0.40            |
| Other              | <b>103</b>  | <b>4.19</b>  | <b>0.65</b> | <b>&lt;0.01</b> | <b>1289</b>   | <b>5.75</b> | <b>0.89</b> | <b>&lt;0.01</b> | <b>166</b>  | <b>4.74</b>  | <b>0.74</b>  | <b>&lt;0.01</b> |
| Respiratory        | 10          | 0.41         | 0.95        | 0.88            | 82            | 0.37        | 0.85        | 0.14            | <b>6</b>    | <b>0.17</b>  | <b>0.4</b>   | <b>0.02</b>     |
| Return to OR       | <b>5</b>    | <b>0.2</b>   | <b>0.39</b> | <b>0.03</b>     | 96            | 0.43        | 0.82        | 0.06            | 24          | 0.69         | 1.34         | 0.15            |
| Sepsis             | 13          | 0.53         | 1.53        | 0.13            | 74            | 0.33        | 0.94        | 0.64            | 6           | 0.17         | 0.49         | 0.08            |
| Stroke             | 8           | 0.33         | 1.2         | 0.60            | <b>43</b>     | <b>0.19</b> | <b>0.69</b> | <b>0.02</b>     | 8           | 0.23         | 0.84         | 0.63            |
| Superficial SSI    | 3           | 0.12         | 1.11        | 0.86            | 24            | 0.11        | 0.97        | 0.88            | 5           | 0.14         | 1.3          | 0.56            |
| Pressure Ulcer     | 9           | 0.37         | 0.91        | 0.78            | <b>49</b>     | <b>0.22</b> | <b>0.52</b> | <b>&lt;0.01</b> | 8           | 0.23         | 0.57         | 0.10            |
| <b>Unplanned</b>   |             |              |             |                 |               |             |             |                 |             |              |              |                 |
| RICU               | 30          | 1.22         | 0.9         | 0.57            | 286           | 1.27        | 0.94        | 0.31            | 51          | 1.46         | 1.08         | 0.59            |
| VAP                | 20          | 0.81         | 1.17        | 0.48            | <b>113</b>    | <b>0.5</b>  | <b>0.71</b> | <b>&lt;0.01</b> | 21          | 0.6          | 0.86         | 0.50            |
| Mortality          | 84          | 3.42         | 0.95        | 0.66            | <b>425</b>    | <b>1.89</b> | <b>0.51</b> | <b>&lt;0.01</b> | <b>81</b>   | <b>2.31</b>  | <b>0.64</b>  | <b>&lt;0.01</b> |
|                    | <b>PCP</b>  | <b>%</b>     | <b>RR</b>   | <b>p</b>        | <b>Tricyc</b> | <b>%</b>    | <b>RR</b>   | <b>p</b>        | <b>Cnb</b>  | <b>%</b>     | <b>RR</b>    | <b>p</b>        |

|                 |    |      |      |       |    |      |      |       |      |      |      |       |
|-----------------|----|------|------|-------|----|------|------|-------|------|------|------|-------|
| CLABSI          | 4  | 0.14 | 2.4  | 0.07  | 2  | 0.13 | 2.11 | 0.28  | 35   | 0.06 | 1.04 | 0.84  |
| Deep SSI        | 4  | 0.14 | 1.06 | 0.91  | 2  | 0.13 | 0.93 | 0.92  | 97   | 0.17 | 1.35 | 0.01  |
| DVT             | 17 | 0.6  | 0.84 | 0.47  | 10 | 0.63 | 0.87 | 0.66  | 474  | 0.84 | 1.21 | <0.01 |
| EtOH            |    |      |      |       |    |      |      |       |      |      |      |       |
| Withdrawal      | 22 | 0.78 | 0.89 | 0.60  | 27 | 1.69 | 1.95 | <0.01 | 535  | 0.94 | 1.1  | 0.04  |
| Cardiac Arrest  | 19 | 0.67 | 1.07 | 0.78  | 6  | 0.38 | 0.59 | 0.20  | 379  | 0.67 | 1.07 | 0.23  |
| CAUTI           | 12 | 0.43 | 1.54 | 0.13  | 9  | 0.56 | 2.04 | 0.03  | 143  | 0.25 | 0.89 | 0.21  |
| Embolism        | 13 | 0.46 | 1.38 | 0.24  | 3  | 0.19 | 0.56 | 0.31  | 185  | 0.33 | 0.97 | 0.70  |
| Extremity CS    | 2  | 0.07 | 0.7  | 0.61  | 3  | 0.19 | 1.86 | 0.28  | 86   | 0.15 | 1.68 | <0.01 |
| Intubation      | 43 | 1.53 | 1.37 | 0.04  | 27 | 1.69 | 1.52 | 0.03  | 607  | 1.07 | 0.95 | 0.28  |
| Kidney          | 21 | 0.75 | 1.35 | 0.17  | 14 | 0.88 | 1.58 | 0.08  | 263  | 0.46 | 0.81 | <0.01 |
| MI              | 5  | 0.18 | 1.21 | 0.67  | 3  | 0.19 | 1.28 | 0.67  | 40   | 0.07 | 0.43 | <0.01 |
| Organ Space     |    |      |      |       |    |      |      |       |      |      |      |       |
| SSI             | 2  | 0.07 | 0.75 | 0.69  | 0  | 0    | 0    | 0.22  | 74   | 0.13 | 1.52 | <0.01 |
| Osteomyelitis   | 0  | 0    | 0    | 0.45  | 0  | 0    | 0    | 0.57  | 16   | 0.03 | 1.53 | 0.14  |
| Other           | 90 | 3.19 | 0.5  | <0.01 | 66 | 4.13 | 0.65 | <0.01 | 2814 | 4.96 | 0.74 | <0.01 |
| Respiratory     | 14 | 0.5  | 1.17 | 0.57  | 9  | 0.56 | 1.32 | 0.40  | 289  | 0.51 | 1.25 | <0.01 |
| Return to OR    | 18 | 0.64 | 1.25 | 0.35  | 9  | 0.56 | 1.1  | 0.78  | 411  | 0.72 | 1.55 | <0.01 |
| Sepsis          | 16 | 0.57 | 1.64 | 0.05  | 3  | 0.19 | 0.54 | 0.28  | 207  | 0.37 | 1.06 | 0.44  |
| Stroke          | 8  | 0.28 | 1.05 | 0.89  | 6  | 0.38 | 1.39 | 0.42  | 113  | 0.2  | 0.7  | <0.01 |
| Superficial SSI | 6  | 0.21 | 1.95 | 0.10  | 0  | 0    | 0    | 0.18  | 87   | 0.15 | 1.52 | <0.01 |
| Pressure Ulcer  | 13 | 0.46 | 1.15 | 0.62  | 6  | 0.38 | 0.93 | 0.87  | 242  | 0.43 | 1.07 | 0.31  |
| Unplanned       |    |      |      |       |    |      |      |       |      |      |      |       |
| RICU            | 30 | 1.06 | 0.79 | 0.19  | 19 | 1.19 | 0.88 | 0.58  | 640  | 1.13 | 0.81 | <0.01 |
| VAP             | 26 | 0.92 | 1.33 | 0.14  | 15 | 0.94 | 1.36 | 0.24  | 500  | 0.88 | 1.35 | <0.01 |
| Mortality       | 79 | 2.8  | 0.78 | 0.03  | 61 | 3.82 | 1.07 | 0.60  | 1635 | 2.88 | 0.77 | <0.01 |

**Supplemental Table 2.** Univariate Analysis of Illicit Drug UDS with Complications. (Significant protective and harmful associations shown in blue and red, respectively). Amp: Amphetamine, Barb: Barbiturate, Ecsy: Ecstasy, Benzo: Benzodiazepine, Mdn: Methadone, Oxy: Oxycodone, PCP: Phencyclidine, Tricyc: Tricyclic Antidepressant, Cnb: Cannabinoid

CLABSI: Central Line Associated Bloodstream Infection, SSI: Surgical Site Infection, DVT: Deep Venous Thrombosis, CAUTI: Catheter Associated Urinary Tract Infection, CS: Compartment Syndrome, RICU: Return to Intensive Care Unit, VAP: Ventilator Associated Pneumonia
